# Supplementary material for: The greenbeard gene tgrB1 regulates altruism and cheating in Dictyostelium discoideum
Source: PubMed Central journal article supplement (PMC11088635; doi:10.1038/s41467-024-48380-4), 2024-05-11
Supplement: 41467_2024_48380_MOESM4_ESM.pdf [file 41467_2024_48380_MOESM4_ESM.pdf]

## **Description of Additional Supplementary Files**

File Name: Supplementary Data 1

Description: Camera Settings for all the micrographs shown in the main text and in the supplementary information, listed by figure names and subpanels.
